# Supplementary material for: Genome-Wide Analysis of DEAD-box RNA Helicase Family in Wheat (Triticum aestivum) and Functional Identification of TaDEAD-box57 in Abiotic Stress Responses
Source: Front Plant Sci. 2021 Dec 9;12:797276. doi: 10.3389/fpls.2021.797276 (PMC8699334; doi:10.3389/fpls.2021.797276)
Supplement: Supplementary Table 8 — The primers used in this study. [file Table_8.xlsx]

## Sheet: Sheet1
TableS8. The primers used in this study.
Primer-name	Primer-sequence
RT-TaDEAD-box141-7D-F	GAGCCAAGGTGAGACTGAG
RT-TaDEAD-box141-7D-R	CCTGTTCCAGATTGTGCTT
RT-TaDEAD-box84-5A-F	AGTCCGGGTGGGCTAATT
RT-TaDEAD-box84-5A-R	CGCAGGCAAGCGATAAAA
RT-TaDEAD-box65-3D-F	AAAAGACGGAACGATGAA
RT-TaDEAD-box65-3D-R	TCTCCAAGGTCGCTGATA
RT-TaDEAD-box135-7A-F	GTTTTTCTCTCTCCTGCCAATC
RT-TaDEAD-box135-7A-R	CAAAGCTCTCGTGAACTTCATC
RT-TaDEAD-box138-7B-F	CTTGATGAAGCTGATGAGATGC
RT-TaDEAD-box138-7B-R	CCTCTTGACAAGAATCCTCACT
RT-TaDEAD-box125-6D-F	GGTCGAGCTAACATCTTTTTCC
RT-TaDEAD-box125-6D-R	TTACGTTTTCTAGGCTAGCCAA
RT-TaDEAD-box57-3B-F	ACTCATGTATCAGCGACCTTAG
RT-TaDEAD-box57-3B-R	CGACAATTAGCCACAAAGGTAC
RT-TaDEAD-box93-5B-F	CGTGTACTGGTTATTTTCCGAC
RT-TaDEAD-box93-5B-R	CAACCCACCCAACAATAAACAT
RT-TaDEAD-box103-5D-F	CAAACCCTTTTGGCGATAGTG
RT-TaDEAD-box103-5D-R	GTCCTCATAGGCGTCAAAATTG
TRT-aDEAD-box116-6B-F	AATTTTTGTAGTGCGTAGGCTG
RT-TaDEAD-box116-6B-R	CAGTGCCTTCTTAGGATCAGAA
TaActin-F	GCCATGTACGTCGCAATTCA
TaActin-R	AGTCGAGAACGATACCAGTAGTACGA
p16318hGFP-TaDEAD57-3B-F	TATCTCTAGAGGATCCATGAATCCCTACGCC
p16318hGFPTaDEAD57-3B-R	TGCTCACCATGGATCCGTATCTTCTACGTAC
